# Supplementary material for: CuII-mediated stabilisation of DNA duplexes bearing consecutive ethenoadenine lesions and its application to a metal-responsive DNAzyme
Source: Royal Society of Chemistry journal article supplement (doi:10.1039/d2cc06179a), 2022-12-09
Supplement: d2cc06179a1.pdf [file d2cc06179a1.pdf]

## Electronic Supplementary Information

### **Cu<sup>II</sup>-mediated stabilisation of DNA duplexes bearing consecutive ethenoadenine lesions and its application to a metal-responsive DNzyme**

Silpa Chandran Rajasree, Yusuke Takezawa\* and Mitsuhiro Shionoya\*

*Department of Chemistry, Graduate School of Science, The University of Tokyo, 7-3-1 Hongo, Bunkyo-ku, Tokyo 113-0033, Japan.*

*e-mail: takezawa@chem.s.u-tokyo.ac.jp; shionoya@chem.s.u-tokyo.ac.jp*

# 1. Experimental methods

## 1-1. DNA synthesis

DNA strands containing 1,*N*<sup>6</sup>-ethenoadenosine ( $\epsilon$ A) were chemically synthesised on an automated DNA synthesiser (NTS M-4-MX DNA/RNA synthesiser). DNA synthesis was carried out on a 1- $\mu$ mol scale in a DMTr-on mode with ultra-mild deprotection phosphoramidites. All the reagents including  $\epsilon$ A phosphoramidites were purchased from Glen Research. The synthesis was performed following the standard protocol except for the extended coupling time (15 min) for  $\epsilon$ A nucleoside. The products were cleaved from the solid supports and deprotected using 25% NH<sub>3</sub> aqueous solution at room temperature for 2.5 h. The cleaved oligonucleotides were loaded on a Poly-Pak II or a Glen-Pak cartridge (Glen Research), detritylated on column using 2% aqueous TFA and then purified roughly. Further purification was performed using reverse phase HPLC (Waters XBridge C18 column, buffers: A = MeCN, B = 0.1 M TEAA (pH 7.0) + 2% MeCN, flow rate: 0.5 mL min<sup>-1</sup>, temperature: 60 °C). The purified DNA strands were characterised by ESI-TOF or MALDI-TOF mass spectrometry. ESI-MS was measured on Waters Micromass LCT premier. MALDI-MS was measured on Bruker Autoflex III using a mixture of 3-hydroxypicolinic acid (3-HPA) and ammonium citrate as a matrix. The concentration of DNA strands was determined based on the UV absorbance at 260 nm. The molar extinction coefficients ( $\epsilon_{260}$ ) of the DNA strands were calculated by the nearest neighbour method. The  $\epsilon_{260}$  value of  $\epsilon$ A nucleotides was assumed as  $5.0 \times 10^3 \text{ M}^{-1} \text{ cm}^{-1}$ .<sup>[1]</sup> The unmodified oligonucleotides and the 6-carboxyfluorescein (FAM)-labelled substrates containing a riboadenosine (rA) for the DNAzyme experiments were purchased from Japan Bio Service Co., Ltd (Saitama, Japan) at HPLC purification grade. The DNA oligonucleotides synthesised in this study are as follows:

**ODN1.** 5'-CAC ATT  $\epsilon$ AGT TGT A-3'. HPLC retention time: 24.2 min (gradient: 4%A (0 min), 7%A (40 min)). ESI-MS:  $m/z$  calcd for [C<sub>130</sub>H<sub>162</sub>N<sub>46</sub>O<sub>77</sub>P<sub>12</sub> - 3H]<sup>3-</sup>: 1322.89; found: 1322.88.

**ODN2.** 5'-TAC AAC  $\epsilon$ AAA TGT G-3'. HPLC retention time: 22.1 min (gradient: 4%A (0 min), 7%A (40 min)). ESI-MS:  $m/z$  calcd for [C<sub>130</sub>H<sub>160</sub>N<sub>52</sub>O<sub>73</sub>P<sub>12</sub> - 3H]<sup>3-</sup>: 1328.90; found: 1328.90.

**ODN3.** 5'-CAC ATT  $\epsilon$ A $\epsilon$ AG TTG TA-3'. HPLC retention time: 27.8 min (gradient: 4%A (0 min), 7%A (40 min)). ESI-MS:  $m/z$  calcd for [C<sub>142</sub>H<sub>174</sub>N<sub>51</sub>O<sub>82</sub>P<sub>13</sub> - 3H]<sup>3-</sup>: 1435.58; found: 1435.55.

**ODN4.** 5'-TAC AAC  $\epsilon$ A $\epsilon$ AA ATG TG-3'. HPLC retention time: 26.4 min (gradient: 4%A (0 min), 7%A (40 min)). ESI-MS:  $m/z$  calcd for  $[C_{142}H_{172}N_{57}O_{78}P_{13} - 3H]^{3-}$ : 1441.25; found: 1441.32.

**ODN5.** 5'-CAC ATT  $\epsilon$ A $\epsilon$ A $\epsilon$ A GTT GTA-3'. HPLC retention time: 24.2 min (gradient: 3%A (0 min), 8%A (40 min)). ESI-MS:  $m/z$  calcd for  $[C_{154}H_{186}N_{56}O_{87}P_{14} - 3H]^{3-}$ : 1547.93; found: 1547.94.

**ODN6.** 5'-TAC AAC  $\epsilon$ A $\epsilon$ A $\epsilon$ A AAT GTG-3'. HPLC retention time: 36.2 min (gradient: 4%A (0 min), 7%A (40 min)). ESI-MS:  $m/z$  calcd for  $[C_{154}H_{184}N_{62}O_{83}P_{14} - 3H]^{3-}$ : 1553.94; found: 1553.91.

**ODN7.** 5'-CAC ATT  $\epsilon$ A $\epsilon$ A $\epsilon$ A  $\epsilon$ AGT TGT A-3'. HPLC retention time: 25.2 min (gradient: 5%A (40 min), 8%A (40 min)). ESI-MS:  $m/z$  calcd for  $[C_{166}H_{198}N_{61}O_{92}P_{15} - 3H]^{3-}$ : 1660.28; found: 1660.37.

**ODN8.** 5'-TAC AAC  $\epsilon$ A $\epsilon$ A $\epsilon$ A  $\epsilon$ AAA TGT G-3'. HPLC retention time: 22.3 min (gradient: 5%A (40 min), 8%A (40 min)). ESI-MS:  $m/z$  calcd for  $[C_{166}H_{196}N_{67}O_{88}P_{15} - 3H]^{3-}$ : 1666.29; found: 1666.41.

**$\epsilon$ A-DNAzyme-1.** 5'-GCG GTA CCA GGT CAA AGG TGG GTG AGG G $\epsilon$ A $\epsilon$ A  $\epsilon$ ATC T-3'. HPLC retention time: 26.2 min (gradient: 6%A (0 min), 8%A (40 min)). MALDI MS:  $m/z$  calcd for  $[C_{341}H_{415}N_{142}O_{199}P_{33} - H]^{-}$ : 10705.81; found: 10705.10.

**$\epsilon$ A-DNAzyme-2.** 5'-AGA  $\epsilon$ A $\epsilon$ A $\epsilon$ A CCC GCG GTT AGA TAG AG-3'. HPLC retention time: 26.5 min (gradient: 6%A (0 min), 8%A (40 min)). MALDI MS:  $m/z$  calcd for  $[C_{232}H_{280}N_{98}O_{130}P_{22} - H]^{-}$ : 7201.76; found: 7202.75.

## 1-2. Spectroscopic analysis

The metal-binding affinity of the DNA oligonucleotides bearing  $\epsilon$ A was evaluated using various spectroscopic measurements such as duplex melting analysis, CD spectroscopy, fluorescence spectroscopy and ESI mass spectrometry.

**Metal sources.** Metal sources were purchased from Fujifilm Wako Pure Chemical Corporation ( $MnCl_2 \cdot 4H_2O$  (99% purity),  $NiCl_2 \cdot 6H_2O$  (99.9%),  $CuSO_4 \cdot 5H_2O$  (99.9%)), Soekawa Chemical Co. ( $ZnSO_4 \cdot 7H_2O$  (99.9%)) and Tokyo Chemical Industry ( $K_2PtCl_4$  (98%)).

**Duplex melting analysis.** All samples for the spectroscopic studies were prepared by mixing the DNA strands (2.0 or 20  $\mu$ M) in 10 mM HEPES buffer (pH 7.0) containing 100 mM NaCl. After

the addition of the metal ions, the solutions were heated to 60 °C and cooled slowly to 4 °C at the rate of  $-1.0\text{ °C min}^{-1}$ . Absorbance at 260 nm was monitored by a UV-1900 spectrophotometer (Shimadzu) equipped with a TMSPC-8 temperature controller while the temperature was raised from 4 °C to 60 °C at the rate of  $0.2\text{ °C min}^{-1}$ . A cell with path length of 1.0 cm or 0.1 cm was used depending on the concentration of DNA samples. A drop of mineral oil was laid on the samples to prevent evaporation. Normalised absorbance shown in the Figures were calculated as follows:

$$\text{Normalised } \Delta A_{260} = \{A_{260}(t\text{ °C}) - A_{260}(4\text{ °C})\} / \{A_{260}(60\text{ °C}) - A_{260}(4\text{ °C})\} \times 100.$$

The melting temperature ( $T_m$ ) was determined from the inflection point of a melting curve using a  $T_m$  analysis software LabSolutions (Shimadzu) with a 17-point adaptive smoothing program. Average  $T_m$  values of at least 3 independent runs were calculated.

**CD spectroscopy.** CD spectra were recorded at 5 °C on a JASCO J-820 spectropolarimeter with 10-time accumulation using a cell with path length of 0.3 cm. The spectra were smoothed using a simple moving average smoothing program.

**Fluorescence spectroscopy.** Fluorescence spectra were recorded on a JASCO FP-8300 spectrofluorometer using a cell with path length of 0.3 cm at 5 °C.

**ESI-TOF mass spectrometry.** Electrospray ionisation-time-of-flight (ESI-TOF) mass spectra were recorded on a Waters Micromass LCT premier. The samples were prepared in 20 mM  $\text{NH}_4\text{OAc}$  buffer (pH 7.0) and annealed just before the measurements (from 60 °C to 4 °C,  $-1.0\text{ °C min}^{-1}$ ). The spectra were smoothed using a mean smoothing program.

### 1-3. RNA-cleaving reaction by DNAzymes

The  $\epsilon\text{A}$ -modified DNAzyme strands were mixed in a reaction buffer (10 mM HEPES (pH 7.0), 0.1 M NaCl) in the absence or presence of  $\text{CuSO}_4$  (3.0 equiv.) and the mixture was annealed prior to the reaction (from 60 °C to 4 °C,  $1.0\text{ °C min}^{-1}$ ). The RNA-cleaving reaction was initiated by adding a FAM-labelled substrate strand. The final concentration of each component was as follows: [DNAzyme] = 10  $\mu\text{M}$ , [substrate] = 10  $\mu\text{M}$ , [ $\text{CuSO}_4$ ] = 0 or 30  $\mu\text{M}$ . After incubated at 25 °C, an aliquot of the sample solution was taken at the designated time points. The reaction was stopped by adding a loading buffer (5.25 M urea, 1.25 mM EDTA and 7.5% (v/v) glycerol). The

cleavage of the substrate was analysed by denaturing polyacrylamide gel electrophoresis (PAGE). The fractions of the cleaved substrate ( $F$ ) were calculated as follows:

$$F(\%) = I_c / (I_c + I_u) \times 100,$$

where  $I_c$  and  $I_u$  are the band intensities of the cleaved product and the uncleaved substrate, respectively. The initial velocity was calculated at the time points when  $F$  was less than 20%. The initial reaction velocity was estimated to be  $0.0157 \text{ h}^{-1}$  and  $0.0833 \text{ h}^{-1}$  in the absence and the presence of  $\text{Cu}^{\text{II}}$ , respectively, and the on-off ratio was determined to be 5.3.

## 2. Supplementary figures and tables

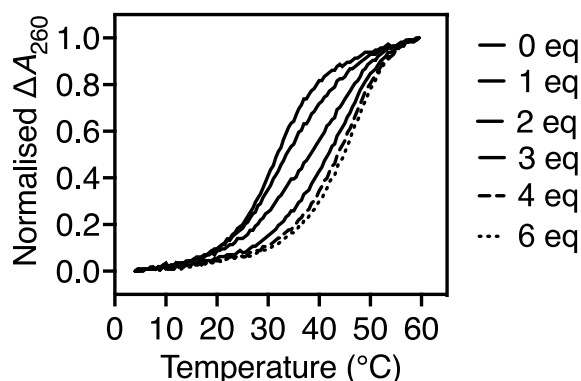

**Fig. S1.** Melting curves of DNA duplex 5·6 containing three  $\epsilon\text{A}-\epsilon\text{A}$  mismatch pairs in the presence of different concentrations of  $\text{Cu}^{\text{II}}$  ions at lower duplex concentration.  $[\text{duplex}] = 2.0 \mu\text{M}$ ,  $[\text{Cu}^{\text{II}}]/[\text{duplex}] = 0, 1, 2, 3$  (solid lines), 4 and 6 (dashed lines) in 10 mM HEPES buffer (pH 7.0), 100 mM NaCl,  $0.2 \text{ }^\circ\text{C min}^{-1}$ .

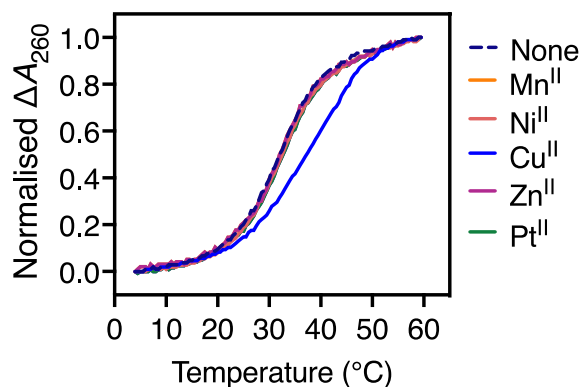

**Fig. S2.** Melting curves of DNA duplex 5·6 containing three  $\epsilon\text{A}-\epsilon\text{A}$  mismatch pairs in the presence of various metal ions.  $[\text{duplex}] = 2.0 \mu\text{M}$ ,  $[\text{metal ion}]/[\text{duplex}] = 0$  (dashed line) or 3.0 (solid lines) in 10 mM HEPES buffer (pH 7.0), 100 mM NaCl,  $0.2 \text{ }^\circ\text{C min}^{-1}$ .

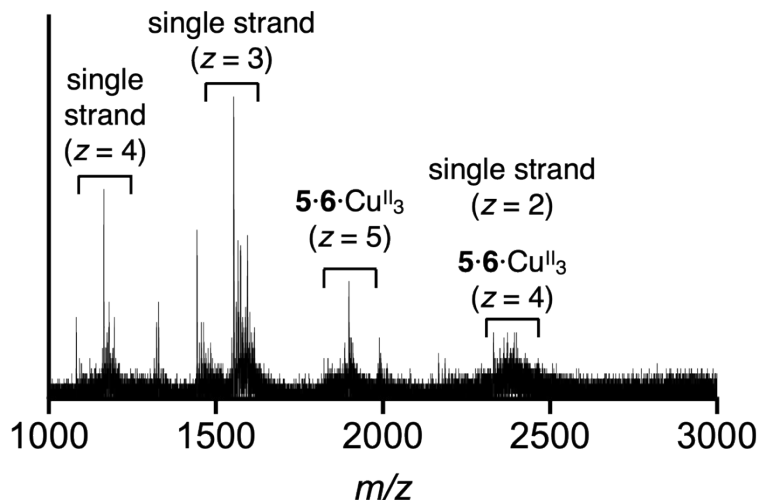

**Fig. S3.** ESI-TOF mass spectrum of duplex **5·6** with 3 equiv. of  $\text{Cu}^{\text{II}}$  ions.  $5\cdot 6\cdot \text{Cu}^{\text{II}}_3 = \text{C}_{308}\text{H}_{364}\text{N}_{118}\text{O}_{170}\text{P}_{28}\text{Cu}_3$  (found: 1898.07 ( $z = -5$ ); calcd for  $[5\cdot 6\cdot \text{Cu}^{\text{II}}_3-5\text{H}]^{5-}$ : 1898.28).  $[\text{duplex}] = 100 \mu\text{M}$ ,  $[\text{Cu}^{\text{II}}] = 300 \mu\text{M}$  in 20 mM  $\text{NH}_4\text{OAc}$  (pH 7.0). Negative mode. A magnified spectrum is shown in Fig. 2b.

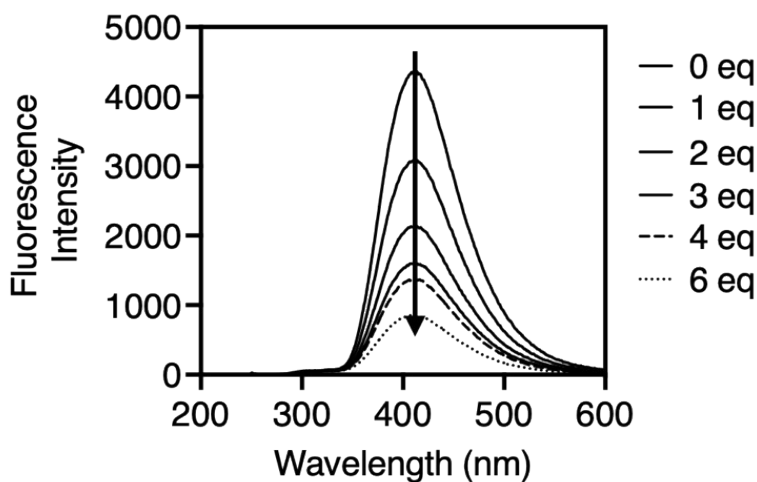

**Fig. S4.** Fluorescence spectra of duplex **5·6** in the presence of varying concentrations of  $\text{Cu}^{\text{II}}$  ions.  $[\text{duplex}] = 20 \mu\text{M}$ ,  $[\text{Cu}^{\text{II}}]/[\text{duplex}] = 0, 1, 2, 3, 4$  and 6 in 10 mM HEPES buffer (pH 7.0), 100 mM NaCl.  $\lambda_{\text{ex}} = 232 \text{ nm}$ ,  $l = 0.3 \text{ cm}$ ,  $5 \text{ }^\circ\text{C}$ . Samples were annealed before the measurement.

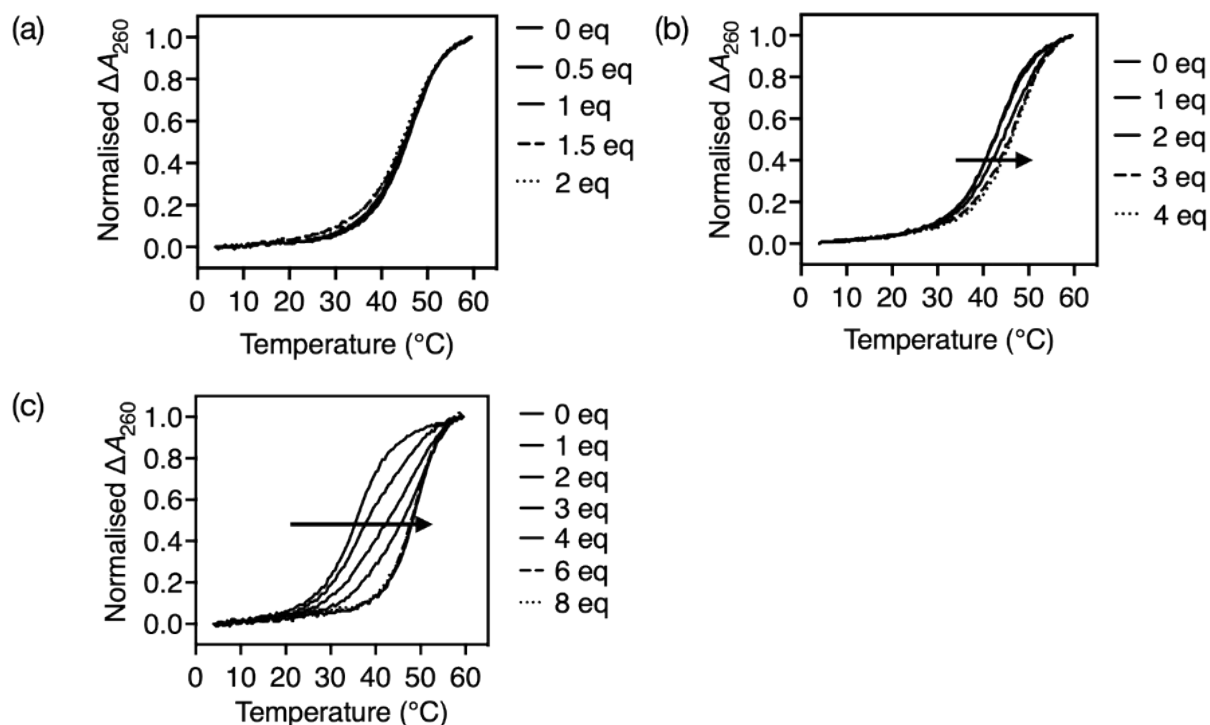

**Fig. S5.** Melting curves of DNA duplexes, (a) **1·2**, (b) **3·4** and (c) **7·8**, containing one, two and four  $\epsilon\mathbf{A}$ – $\epsilon\mathbf{A}$  pairs, respectively, in the presence of different concentrations of  $\text{Cu}^{\text{II}}$  ions. [duplex] = 20  $\mu\text{M}$  in 10 mM HEPES buffer (pH 7.0), 100 mM NaCl, 0.2  $^{\circ}\text{C min}^{-1}$ . (a)  $[\text{Cu}^{\text{II}}]/[\text{duplex}] = 0, 0.5, 1$  (solid lines), 1.5 and 2 (dashed lines), (b)  $[\text{Cu}^{\text{II}}]/[\text{duplex}] = 0, 1, 2$  (solid lines), 3 and 4 (dashed lines), (c)  $[\text{Cu}^{\text{II}}]/[\text{duplex}] = 0, 1, 2, 3, 4$  (solid lines), 6 and 8 (dashed lines).

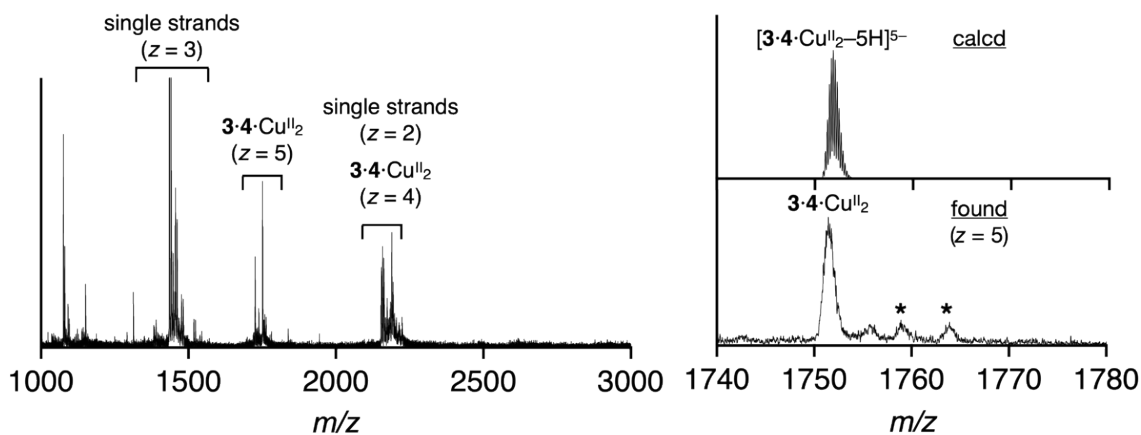

**Fig. S6.** ESI-TOF mass spectrum of duplex **3·4** with 2 equiv. of  $\text{Cu}^{\text{II}}$  ions.  $\mathbf{3\cdot4\cdot Cu}^{\text{II}}_2 = \text{C}_{284}\text{H}_{342}\text{N}_{108}\text{O}_{160}\text{P}_{26}\text{Cu}_2$  (found: 1751.37 ( $z = -5$ ); calcd for  $[\mathbf{3\cdot4\cdot Cu}^{\text{II}}_2 - 5\text{H}]^{5-}$ : 1751.07). [duplex] = 100  $\mu\text{M}$ ,  $[\text{Cu}^{\text{II}}] = 200 \mu\text{M}$  in 20 mM  $\text{NH}_4\text{OAc}$  (pH 7.0). Negative mode. Signals ascribed to sodium, potassium and/or ammonium adducts are shown with asterisk (\*).

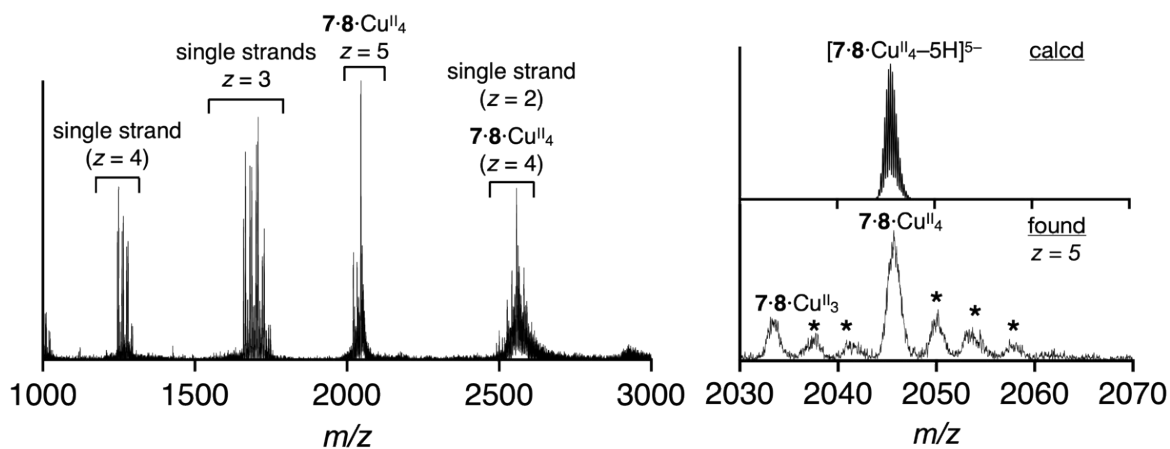

**Fig. S7.** ESI-TOF mass spectrum of duplex **7·8** with 3 equiv. of  $\text{Cu}^{\text{II}}$  ions.  $7\cdot 8\cdot \text{Cu}^{\text{II}}_4 = \text{C}_{332}\text{H}_{386}\text{N}_{128}\text{O}_{180}\text{P}_{30}\text{Cu}_4$  (found: 2045.55 ( $z = -5$ ); calcd for  $[7\cdot 8\cdot \text{Cu}^{\text{II}}_4-5\text{H}]^{5-}$ : 2045.48). [duplex] = 100  $\mu\text{M}$ ,  $[\text{Cu}^{\text{II}}] = 400 \mu\text{M}$  in 20 mM  $\text{NH}_4\text{OAc}$  (pH 7.0). Negative mode. Signals ascribed to sodium, potassium and/or ammonium adducts are shown with asterisk (\*).

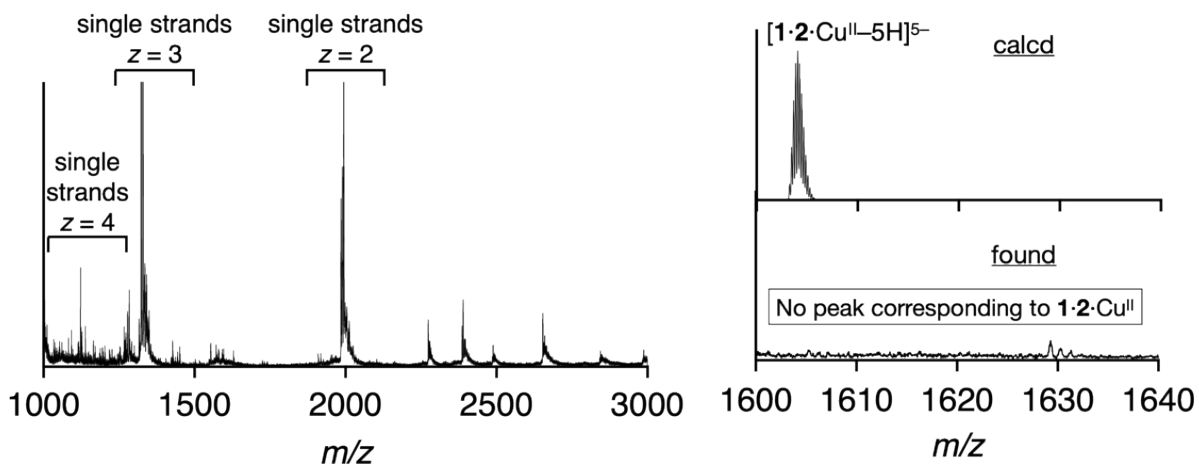

**Fig. S8.** ESI-TOF mass spectrum of duplex **1·2** with 1 equiv. of  $\text{Cu}^{\text{II}}$  ions.  $1\cdot 2\cdot \text{Cu}^{\text{II}} = \text{C}_{260}\text{H}_{320}\text{N}_{98}\text{O}_{150}\text{P}_{24}\text{Cu}$  (calcd for  $[1\cdot 2\cdot \text{Cu}^{\text{II}}-5\text{H}]^{5-}$ : 1603.87). [duplex] = 100  $\mu\text{M}$ ,  $[\text{Cu}^{\text{II}}] = 100 \mu\text{M}$  in 20 mM  $\text{NH}_4\text{OAc}$  (pH 7.0). Negative mode. Signal ascribed to  $1\cdot 2\cdot \text{Cu}^{\text{II}}$  was not observed.



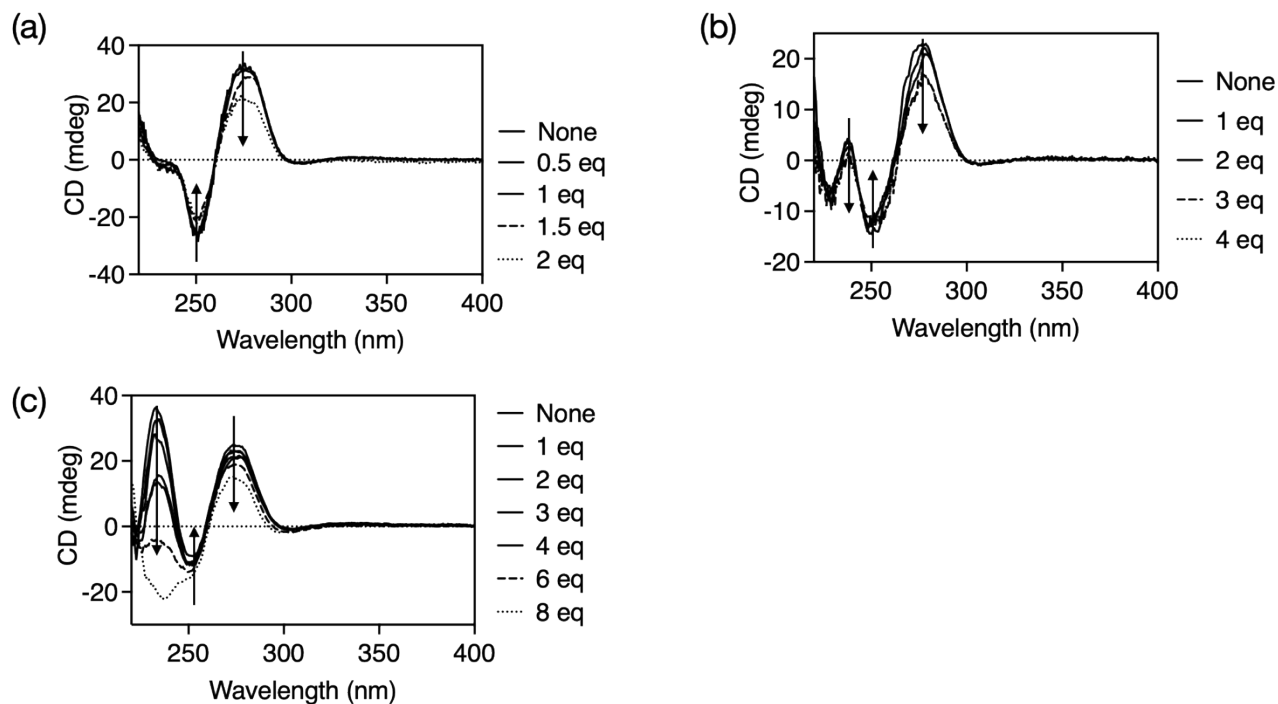

**Fig. S9.** CD spectra of duplex **1·2**, **3·4** and **7·8** with one, two and four  $\epsilon\text{A}$ - $\epsilon\text{A}$  pairs, respectively, in the presence of different concentration of  $\text{Cu}^{\text{II}}$  ions.  $[\text{duplex}] = 20 \mu\text{M}$  in 10 mM HEPES buffer (pH 7.0), 100 mM NaCl.  $l = 0.3 \text{ cm}$ ,  $5 \text{ }^\circ\text{C}$ . (a)  $[\text{Cu}^{\text{II}}]/[\text{duplex}] = 0, 0.5, 1$  (solid lines), 1.5 and 2 (dashed lines), (b)  $[\text{Cu}^{\text{II}}]/[\text{duplex}] = 0, 1, 2$  (solid lines), 3 and 4 (dashed lines), (c)  $[\text{Cu}^{\text{II}}]/[\text{duplex}] = 0, 1, 2, 3, 4$  (solid lines), 6 and 8 (dashed lines). Samples were annealed before the measurement.

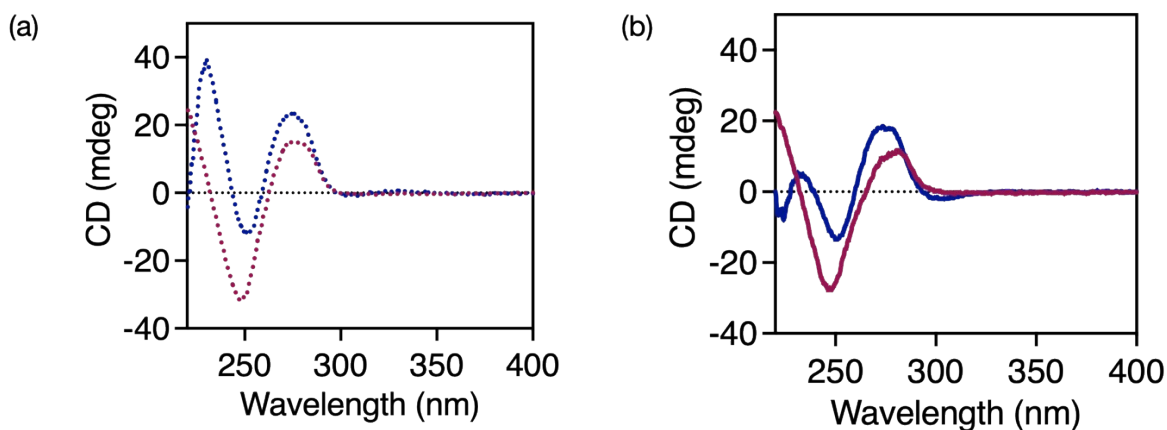

**Fig. S10.** CD spectra of natural full-match 15-mer duplex **5A·6T** (red) and duplex **5·6** with three  $\epsilon\text{A}$ - $\epsilon\text{A}$  pairs (blue) in the absence (a) and presence of  $\text{Cu}^{\text{II}}$  ions (b).  $[\text{duplex}] = 20 \mu\text{M}$ ,  $[\text{Cu}^{\text{II}}]/[\text{duplex}] = 0$  (a) and 3 (b) in 10 mM HEPES buffer (pH 7.0), 100 mM NaCl.  $l = 0.3 \text{ cm}$ ,  $5 \text{ }^\circ\text{C}$ . Samples were annealed before the measurement.

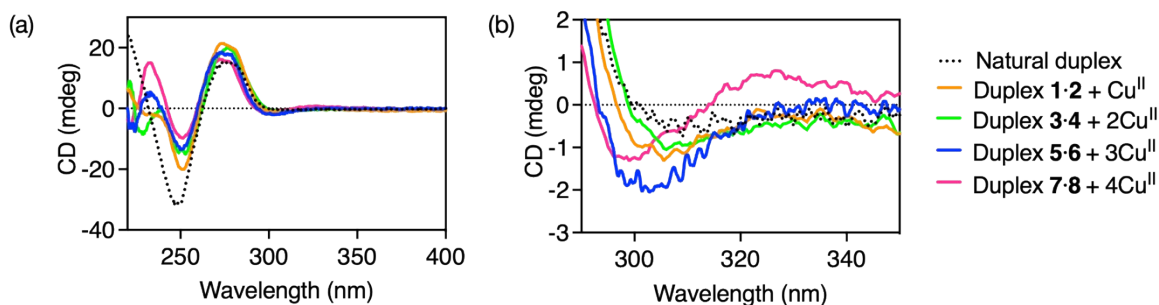

**Fig. S11.** (a) CD spectra of natural full-match duplex 5A·6T (dashed line) and duplexes 1·2, 3·4, 5·6 and 7·8 with one, two, three and four  $\epsilon$ A- $\epsilon$ A pairs, respectively, in the presence of stoichiometric amount of  $\text{Cu}^{\text{II}}$  ions. (b) Magnified spectra to show the new signal around 320 nm. [duplex] = 20  $\mu\text{M}$ ,  $[\text{Cu}^{\text{II}}]/[\epsilon\text{A}-\epsilon\text{A}] = 1.0$  in 10 mM HEPES buffer (pH 7.0), 100 mM NaCl.  $l = 0.3$  cm, 5  $^{\circ}\text{C}$ . Samples were annealed before the measurement.

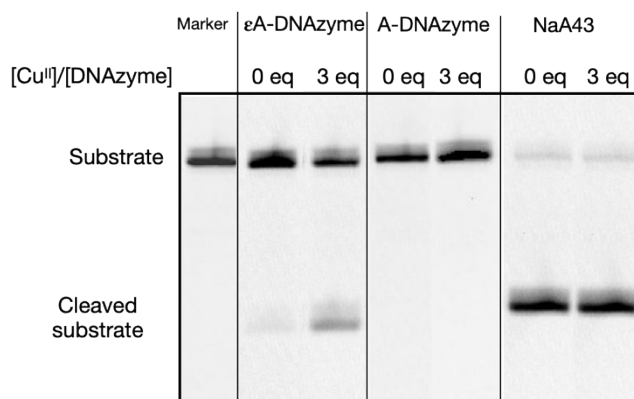

**Fig. S12.** Denaturing PAGE analysis of the RNA-cleaving reaction by DNAzymes. [DNAzyme] = 10  $\mu\text{M}$ , [substrate] = 10  $\mu\text{M}$ ,  $[\text{Cu}^{\text{II}}]/[\text{DNAzyme}] = 0$  or 3.0 in 10 mM HEPES (pH 7.0), 0.1 M NaCl, 25  $^{\circ}\text{C}$ , 6 h. FAM detection. The results with a positive control (NaA43 DNAzyme) and a negative control (A-DNAzyme) are also shown.

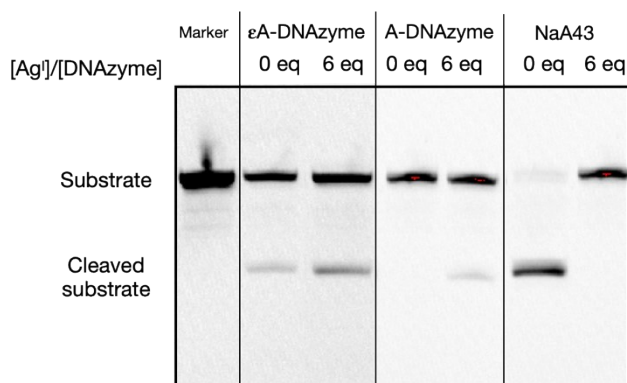

**Fig. S13.** Denaturing PAGE analysis of the RNA-cleaving reaction by DNAzymes. [DNAzyme] = 10  $\mu\text{M}$ , [substrate] = 10  $\mu\text{M}$ ,  $[\text{Ag}^{\text{I}}]/[\text{DNAzyme}] = 0$  or 6.0 in 10 mM HEPES (pH 7.0), 0.1 M  $\text{NaNO}_3$ , 25  $^{\circ}\text{C}$ , 6 h. FAM detection. The results with a positive control (NaA43 DNAzyme) and a negative control (A-DNAzyme) are also shown. Note that the activity of the unmodified NaA43 DNAzyme was greatly suppressed upon  $\text{Ag}^{\text{I}}$  addition, presumably due to the unintended binding of  $\text{Ag}^{\text{I}}$  ions to the natural nucleobases.

**Table S1.** Base sequences of DNA strands used in this study.

| Name                   | Sequence (5'→3')                                                                 |
|------------------------|----------------------------------------------------------------------------------|
| ODN1                   | CAC ATT $\epsilon$ AGT TGT A                                                     |
| ODN2                   | TAC AAC $\epsilon$ AAA TGT G                                                     |
| ODN3                   | CAC ATT $\epsilon$ A $\epsilon$ AG TTG TA                                        |
| ODN4                   | TAC AAC $\epsilon$ A $\epsilon$ AA ATG TG                                        |
| ODN5                   | CAC ATT $\epsilon$ A $\epsilon$ A $\epsilon$ A GTT GT A                          |
| ODN6                   | TAC AAC $\epsilon$ A $\epsilon$ A $\epsilon$ A AAT GTG                           |
| ODN7                   | CAC ATT $\epsilon$ A $\epsilon$ A $\epsilon$ A $\epsilon$ AGT TGT A              |
| ODN8                   | TAC AAC $\epsilon$ A $\epsilon$ A $\epsilon$ A $\epsilon$ AAA TGT G              |
| ODN5A                  | CAC ATT AAA GTT GTA                                                              |
| ODN6A                  | TAC AAC AAA AAT GTG                                                              |
| ODN6T                  | TAC AAC TTT AAT GTG                                                              |
| $\epsilon$ A-DNAzyme-1 | GCG GTA CCA GGT CAA AGG TGG GTG AGG G $\epsilon$ A $\epsilon$ A $\epsilon$ ATC T |
| $\epsilon$ A-DNAzyme-2 | AGA $\epsilon$ A $\epsilon$ A $\epsilon$ A CCC GCG GTT AGA TAG AG                |
| substrate              | FAM-CTC TAT CTA T(rA)G GAA GTA CCG C                                             |
| NaA43 DNAzyme          | GCG GTA CCA GGT CAA AGG TGG GTG AGG GGA CGC CAA GAG TCC<br>CCG CGG TTA GAT AGA G |
| A-DNAzyme-1            | GCG GTA CCA GGT CAA AGG TGG GTG AGG GAA ATC T                                    |
| A-DNAzyme-2            | AGA AAA CCC GCG GTT AGA TAG AG                                                   |

### 3. Reference

1. S. Mandal, C. Wang, R. K. Prajapati, J. Kösters, S. Verma, L. Chi and J. Müller, *Inorg. Chem.*, 2016, **55**, 7041–7050.
